# Supplementary material
Source: publisher figshare collection journal article supplement (https://acs.figshare.com/ndownloader/files/26741892)
Supplement: Supplementary file 1 [file 26741892]

---

Supporting Information for

**Topologically Enhanced Dual-Network Hydrogels with  
Rapid Recovery for Low-Hysteresis, Self-Adhesive Epidemic  
Electronics**

*Guangyong Zhang<sup>†</sup>, Song Chen<sup>\*, †</sup>, Zefei Peng<sup>†</sup>, Wei Shi<sup>†</sup>, Zelin Liu<sup>†</sup>, Hang Shi<sup>†</sup>,*

*Kaiying Luo<sup>†</sup>, Ganghui Wei<sup>†</sup>, Hongqiang Mo<sup>‡</sup>, Bin Li<sup>‡</sup>, Lan Liu<sup>\*, †</sup>*

<sup>†</sup>College of Materials Science and Engineering, Key Lab of Guangdong Province for High Property and Functional Macromolecular Materials, South China University of Technology, Guangzhou 510641, China.

<sup>‡</sup>College of Automation Science and Engineering, South China University of Technology, Guangzhou 510641, China.

\* Corresponding authors.

E-mail address: chensong@scut.edu.cn (Song Chen), psliulan@scut.edu.cn (Lan Liu).

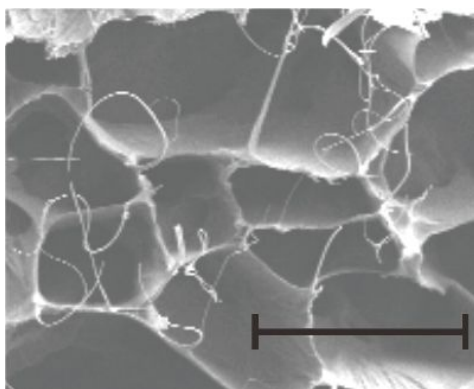

**Figure S1** Enlarged SEM image of PAA hydrogel (0.2 wt% DA/AM). The scale bar is 30  $\mu\text{m}$ .

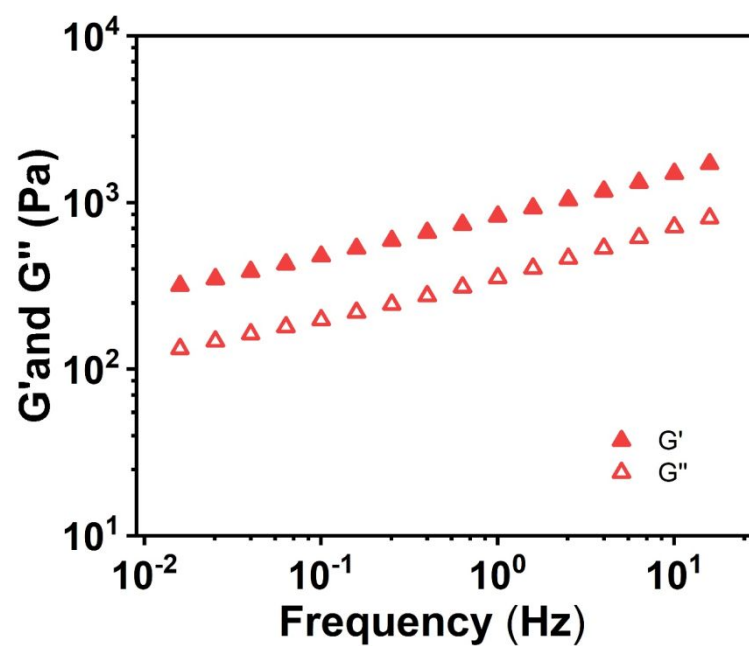

**Figure S2** Frequency dependence of storage modulus ( $G'$ ) and loss modulus ( $G''$ ) for PAM hydrogel after soaking in  $\text{AlCl}_3$  solution.

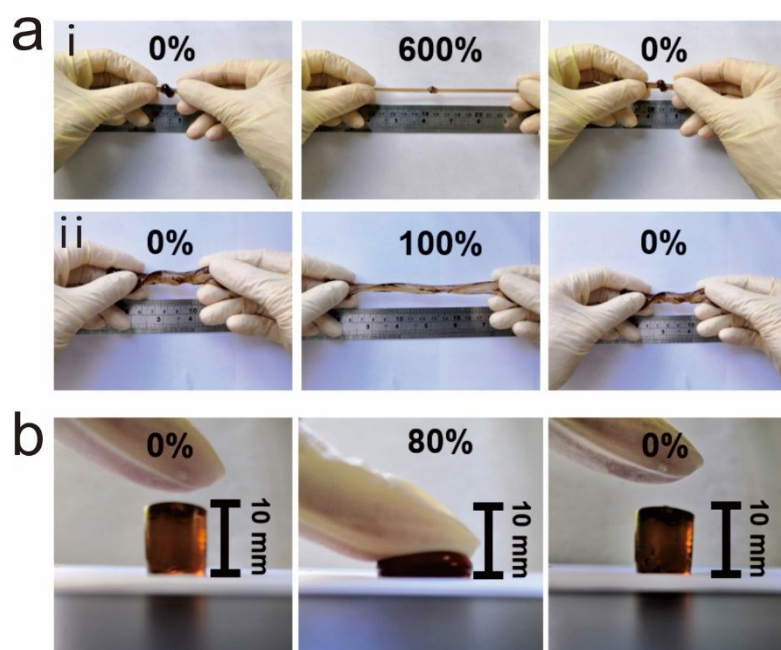

**Figure S3** (a) Digital photograph showing the stretchability of PAa (0.2 wt% DA/AM) when it was knotted ( i ) and twisted ( ii ). (b) Digital photograph showing the compression and resilience ability of the PAa (0.2 wt% DA/AM) hydrogel.

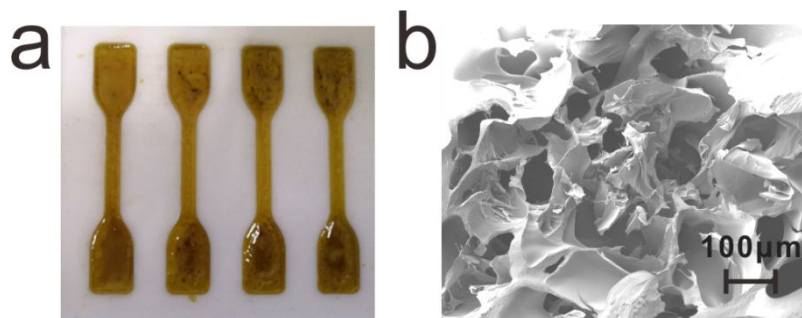

**Figure S4** Digital photograph (a) and SEM image (b) of PAM/PDA hydrogel with DA/AM weight ratio of 0.5%. Agglomeration of PDA is clearly observed in the photograph.

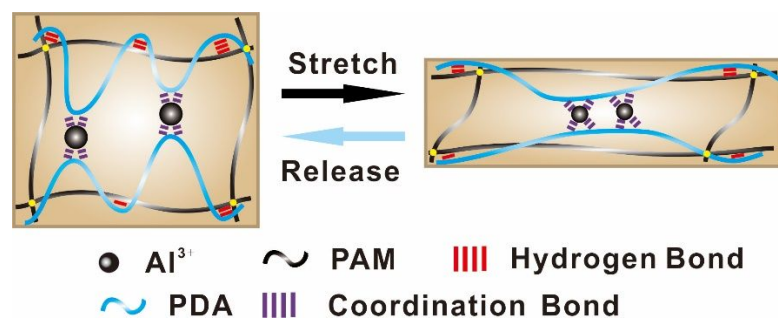

**Figure S5** Schematic illustration for the dual network deformation during the stretching-releasing test.

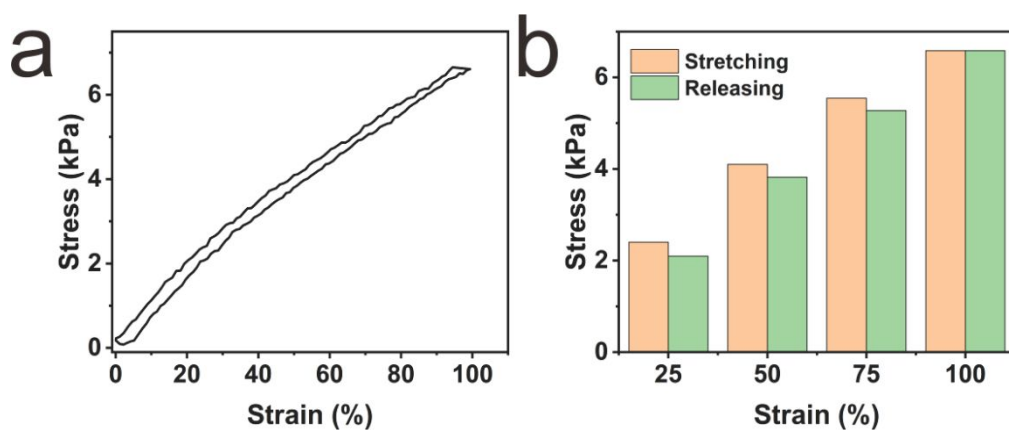

**Figure S6** Single tensile loading-unloading tests of pure PAM hydrogel with tensile strain of 100% (a) and corresponding stress values at certain strain (b).

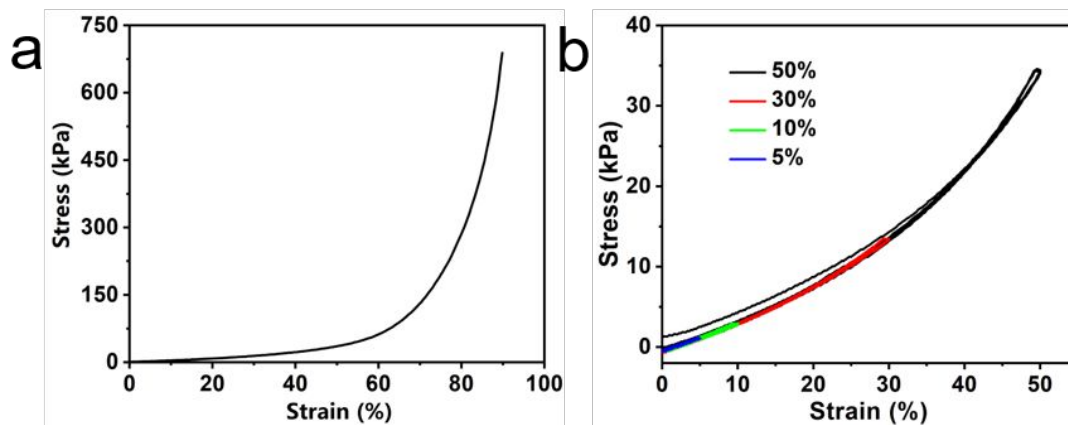

**Figure S7** (a) Compression stress-strain curves of PAa hydrogel. (b) Loading-unloading stress-strain curves of PAa hydrogel under different compression strain.



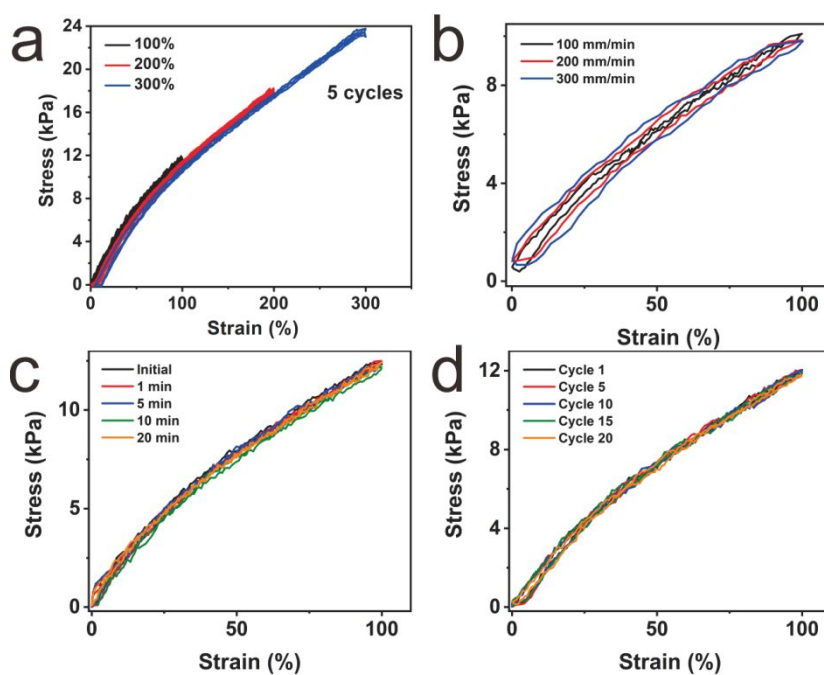

**Figure S8** Dynamic properties of PAA hydrogels under different strains (a), testing speeds (b), consecutive test with (c) and without (d) rest time.

**Table S1**

Mechanical properties of the hydrogels

| Hydrogel |                           | Fracture<br>Stress (kPa) | Breaking<br>Elongation<br>(%) | Fracture<br>Toughness<br>(kJ/m <sup>3</sup> ) |
|----------|---------------------------|--------------------------|-------------------------------|-----------------------------------------------|
| Content  | DA/AM weight<br>ratio (%) |                          |                               |                                               |
| PAM/PDA  | 0                         | 21.1                     | 628.3                         | 88.7                                          |
|          | 0.05                      | 24.7                     | 620.8                         | 97.4                                          |
|          | 0.10                      | 27.7                     | 662.5                         | 103.8                                         |
|          | 0.20                      | 31.9                     | 636.5                         | 113.4                                         |
|          | 0.50                      | 12.6                     | 486.3                         | 40.4                                          |
| PAa      | 0.05                      | 52.1                     | 877.0                         | 276.6                                         |
|          | 0.10                      | 62.5                     | 1010.4                        | 362.6                                         |
|          | 0.20                      | 92.0                     | 1090.8                        | 462.4                                         |
